# Supplementary material
Source: publisher figshare collection journal article supplement (https://tandf.figshare.com/articles/dataset/_/12342977)

## Pseudoword Repetition

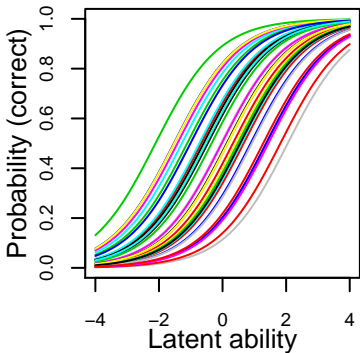

Supplement: Supplementary file 1 [file 1]

## Receptive Vocabulary

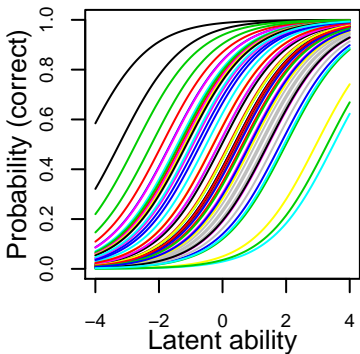

Supplement: Supplementary file 2 [file 1]

## Digit Span

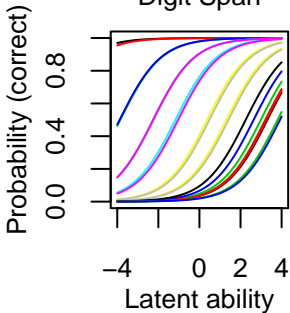

Supplement: Supplementary file 3 [file 1]

## Word Articulation

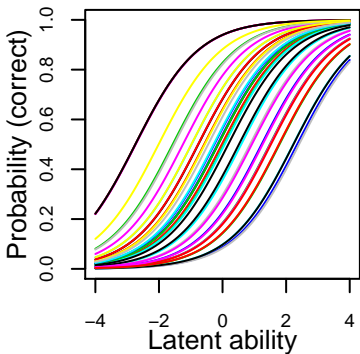

Supplement: Supplementary file 4 [file 1]
